# Supplementary material for: Ets-1 deficiency leads to altered B cell differentiation, hyperresponsiveness to TLR9 and autoimmune disease
Source: Oxford University Press journal article supplement (doi:10.1093/intimm/dxh295), 2005-07-28
Supplement: dxh295_Supplementary_Data.zip [file dxh295_Supplementary_Data.zip]

Archive with 1 entries (1 files):
- dxh295_Supplementary_Data.pdf
