# Supplementary material for: Ets-1 deficiency leads to altered B cell differentiation, hyperresponsiveness to TLR9 and autoimmune disease
Source: Oxford University Press journal article supplement (doi:10.1093/intimm/dxh295), 2005-07-28
Supplement: dxh295_Supplementary_Data.zip [file dxh295_Supplementary_Data.zip › dxh295_Supplementary_Data.pdf]

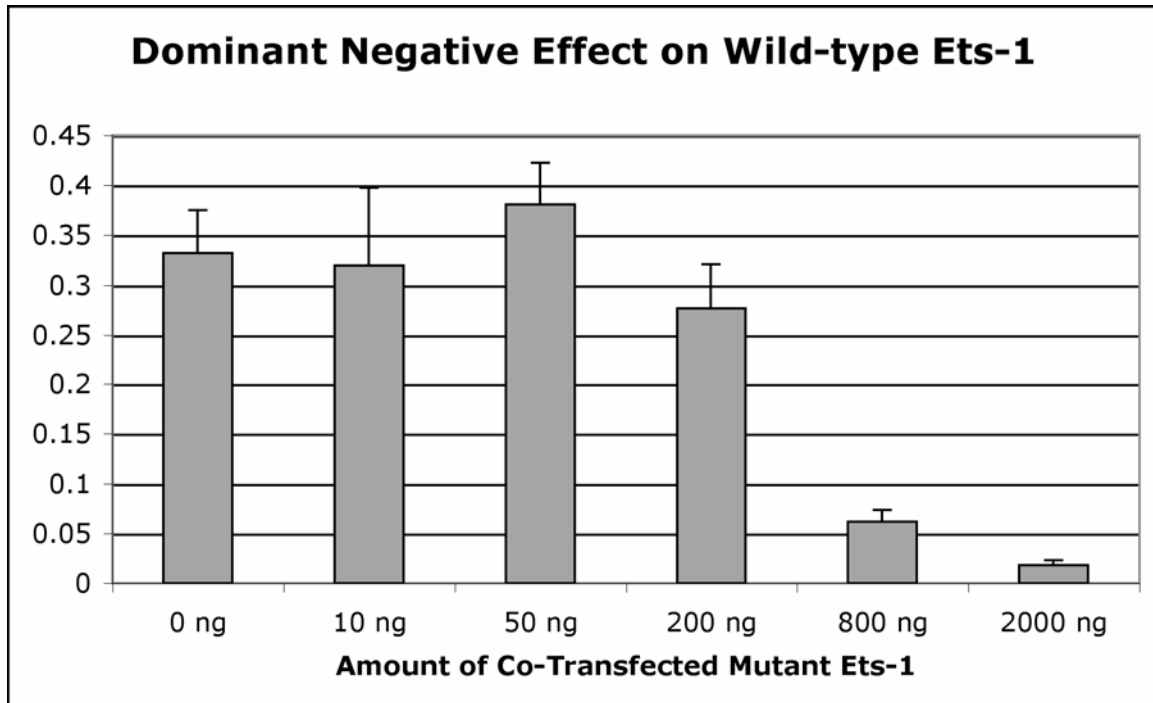

**Supplemental Figure 1. The Pointed domain mutant Ets-1 protein has a dominant negative effect on wild-type Ets-1 protein at high concentrations.** HeLa cells were transfected with an Ets-dependent reporter gene along with a fixed amount (200 ng) of a plasmid driving expression of wild-type Ets-1. Cells were co-transfected a plasmid driving expression of the Pointed domain deletion mutant of Ets-1 at the concentrations indicated above. The graph shows the average and standard deviation of three separate transfections.

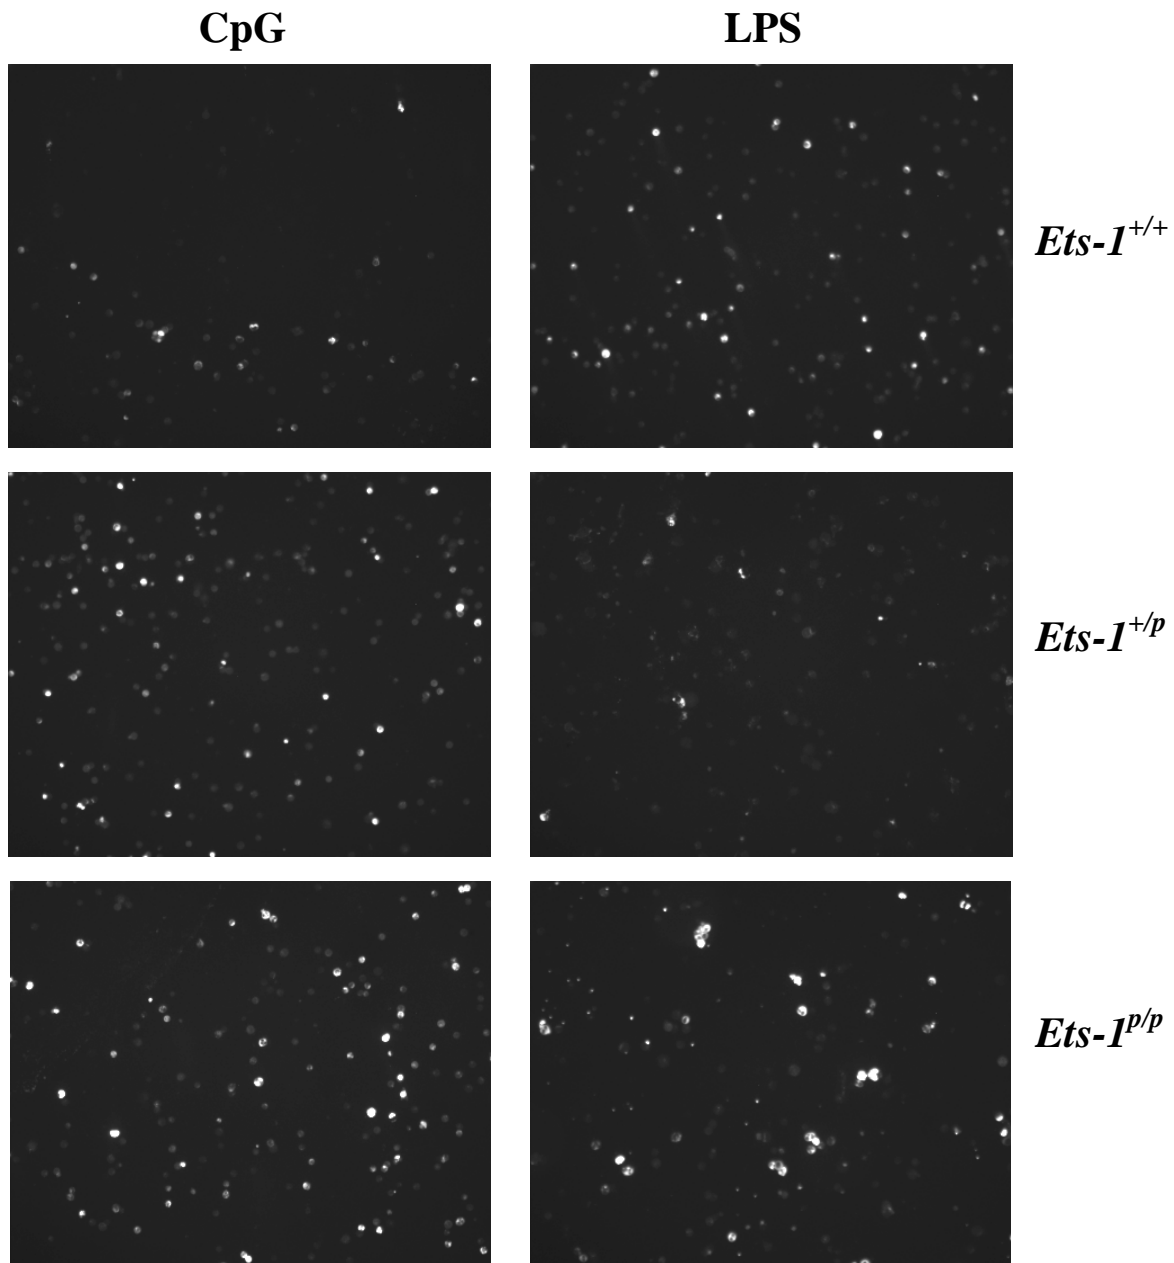

**Supplemental Figure 2. CpG ODN and LPS induce differentiation of *Ets-1*<sup>+/+</sup>, *Ets-1*<sup>+/p</sup> and *Ets-1*<sup>p/p</sup> B cells.** B cells purified from the spleens of mice were cultured *in vitro* in the presence of 5 µg/ml CpG ODN or 10 µg/ml bacterial LPS. After 72 hours of stimulation, cells were allowed to settle onto coverslips, fixed and stained with FITC-conjugated anti-mouse IgM. Cells staining brightly for IgM represent IgM-secreting plasma cells or plasmablasts.

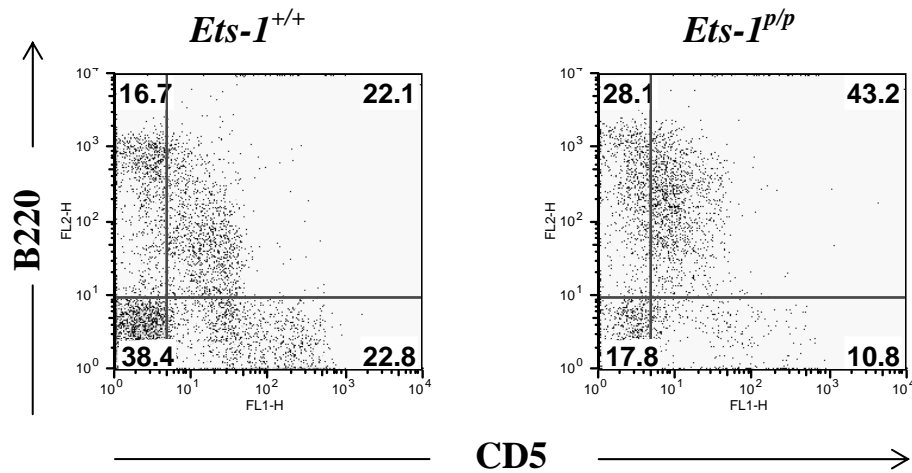

**Supplemental Figure 3. *Ets-1*<sup>p/p</sup> mice have peritoneal B-1a B cells.** Cells isolated from peritoneal lavages of *Ets-1*<sup>p/p</sup> and *Ets-1*<sup>p/p</sup> mice were stained with B220-PE and CD5-FITC and subjected to flow cytometry analysis. Note mice of both genotypes contain B220<sup>+</sup>CD5<sup>+</sup> B-1a B cells.
